# Supplementary material
Source: publisher figshare collection journal article supplement (https://diabetesjournals.figshare.com/ndownloader/files/22454690)
Supplement: Supplementary file 1 [file 22454690]

**Red arrow**- Presentation to the Endocrinology Section

**Light blue arrow**- Modification of the Standardized Template

**Purple arrow**- Started sending Monthly QI Reports

**Purple arrow**- dietician left

**Yellow arrow**- advanced nurse practitioner started seeing patients

**Orange arrow**- dietician started working in the section
